# Supplementary material
Source: PubMed Central journal article supplement (PMC3115450)
Supplement: NIHMS299306-supplement-1_si_001.pdf [file NIHMS299306-supplement-1_si_001.pdf]

**HD Exchange and PLIMSTEX Determine the Affinities and Order of Binding of Ca<sup>2+</sup>  
with Troponin C**

*Richard Y-C. Huang, Don L. Rempel, Michael L. Gross*

**Supporting information**

## SUPPLEMENTAL FIGURES

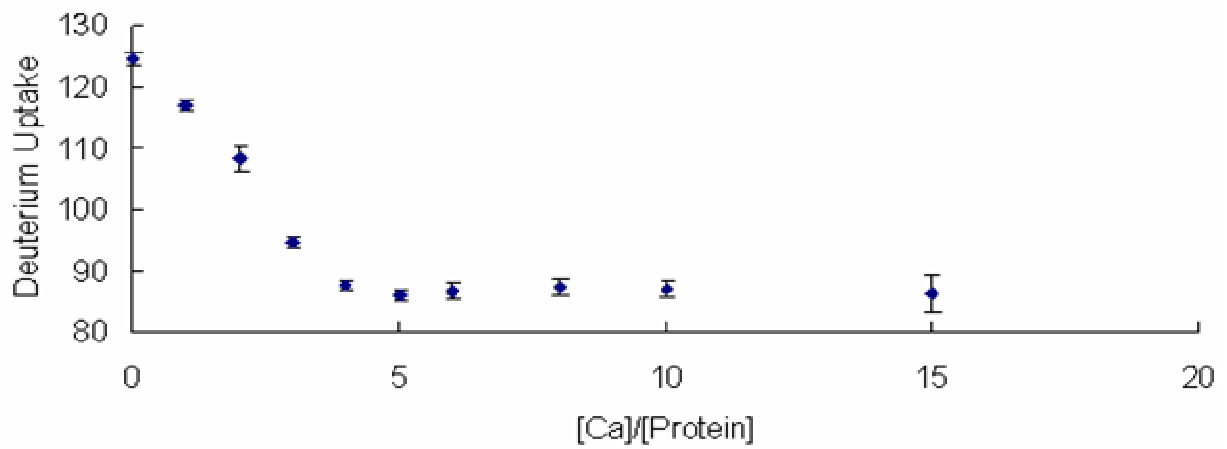

**Figure S1.** “Sharp-break” PLIMSTEX titration curve; protein concentration = 15  $\mu\text{M}$ .

The junction of the two arms of the curves indicates the stoichiometry of  $\text{Ca}^{2+}$  binding is

4:1.

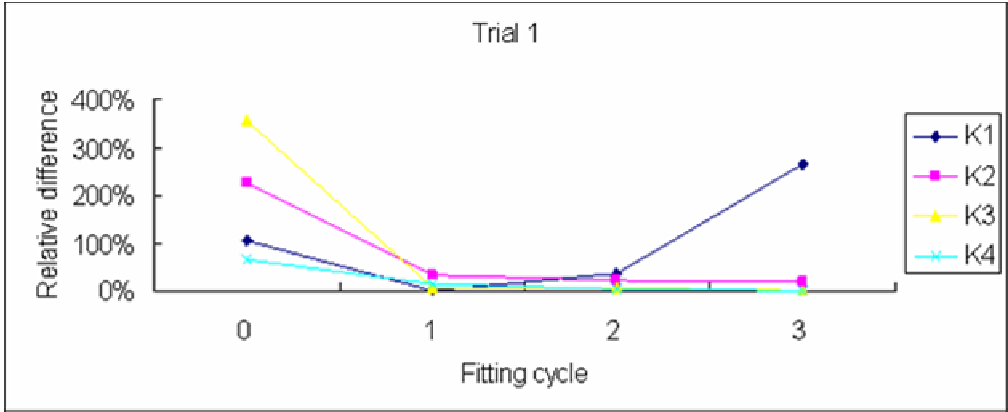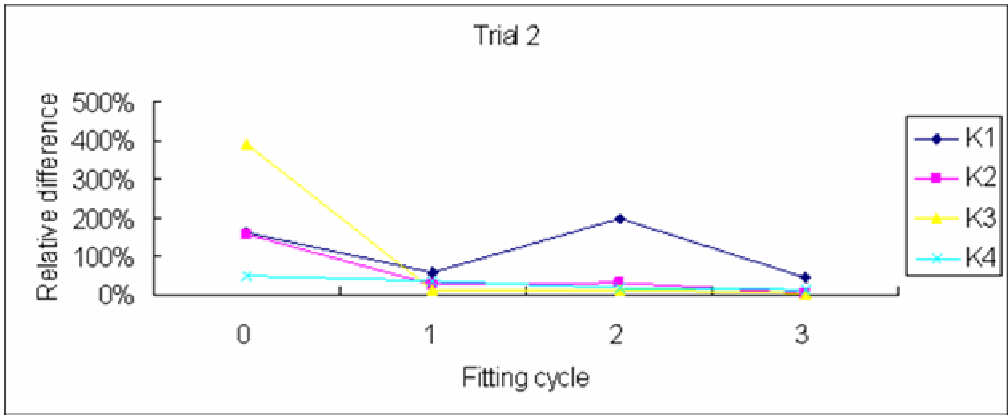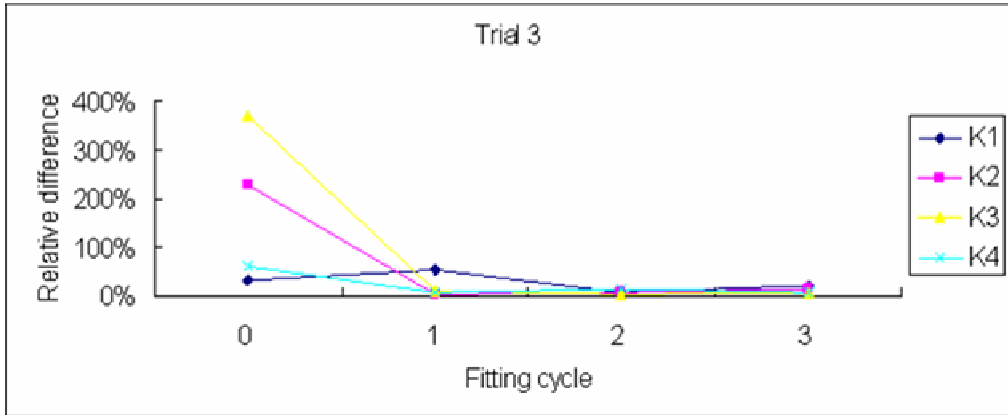

**Figure S2.** Relative differences between K's values before and after each cycle of fitting as a function of the number of fitting cycles.

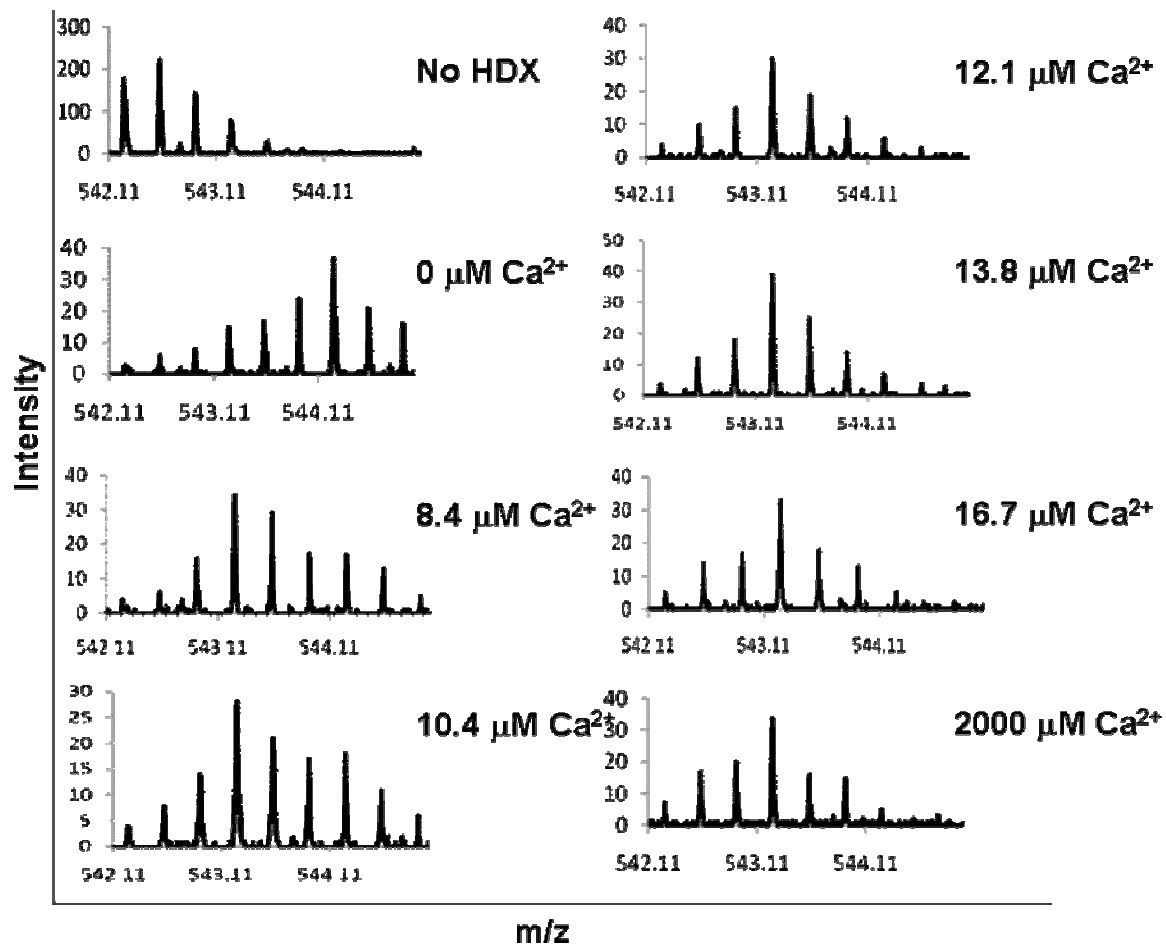

**Figure S3.** ESI mass spectra of the deuterated triply charged peptic peptide 136-149 (EF-IV) with respect to  $\text{Ca}^{2+}$  concentration.

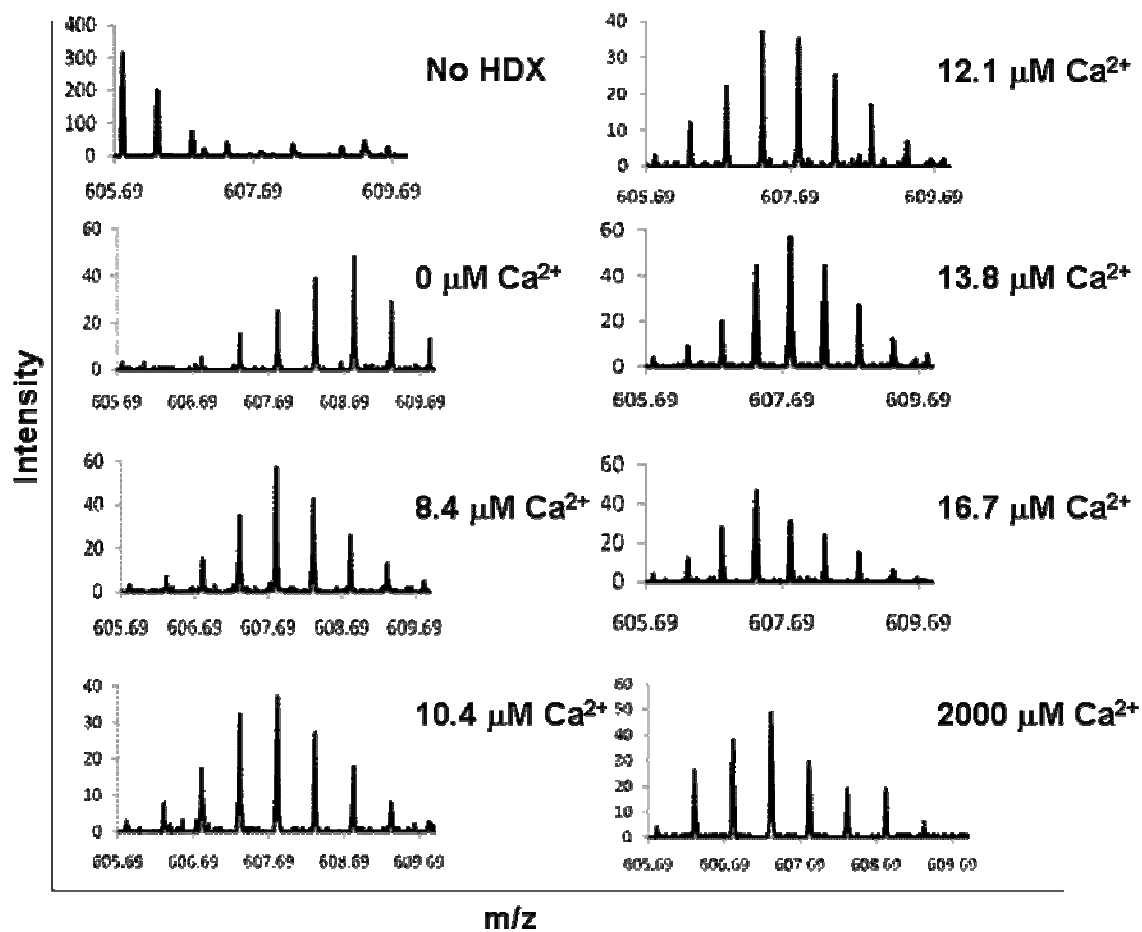

**Figure S4.** ESI mass spectra of deuterated doubly charged peptic peptide 100-109 (EF-III) with respect to  $\text{Ca}^{2+}$  concentration.

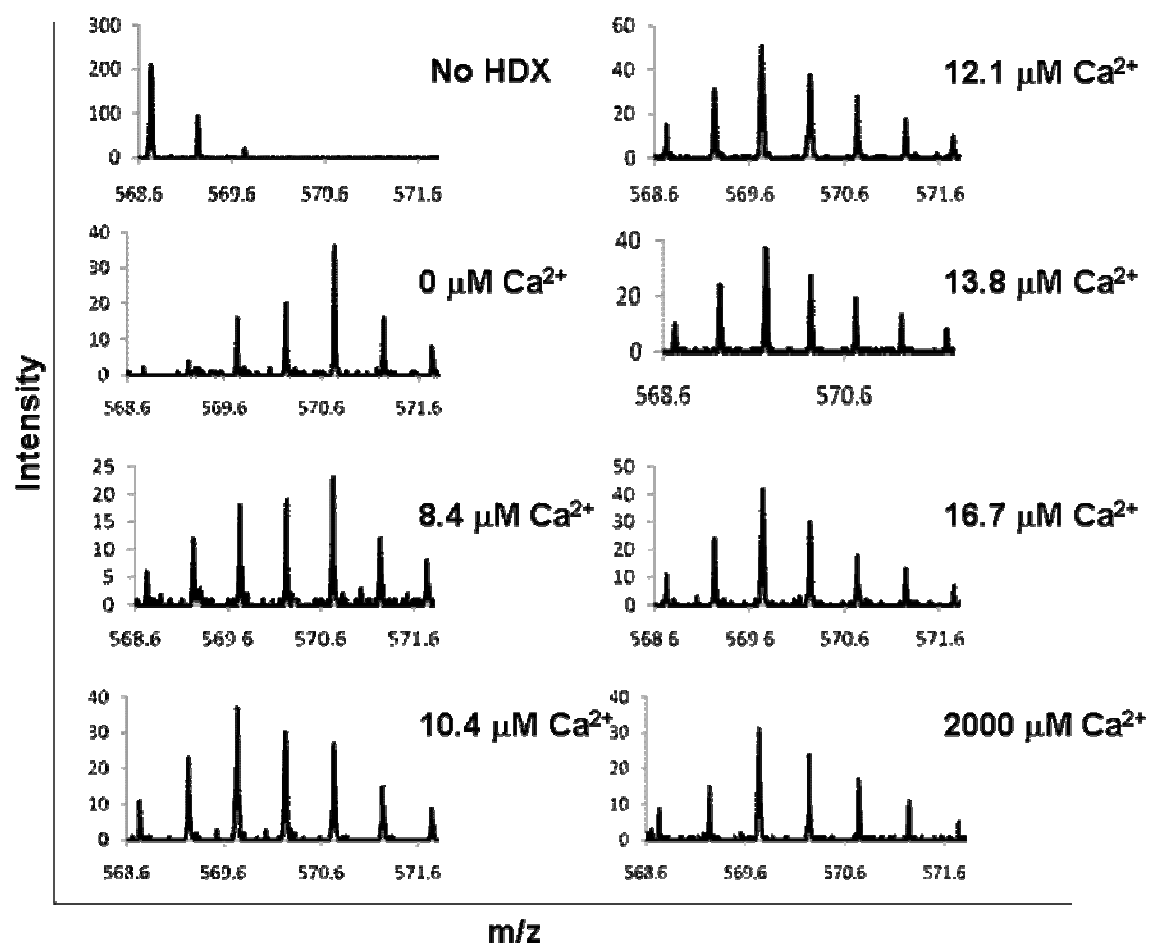

**Figure S5.** ESI mass spectra of the deuterated doubly charged peptic peptide 63-73 (EF-II) with respect to  $\text{Ca}^{2+}$  concentration.

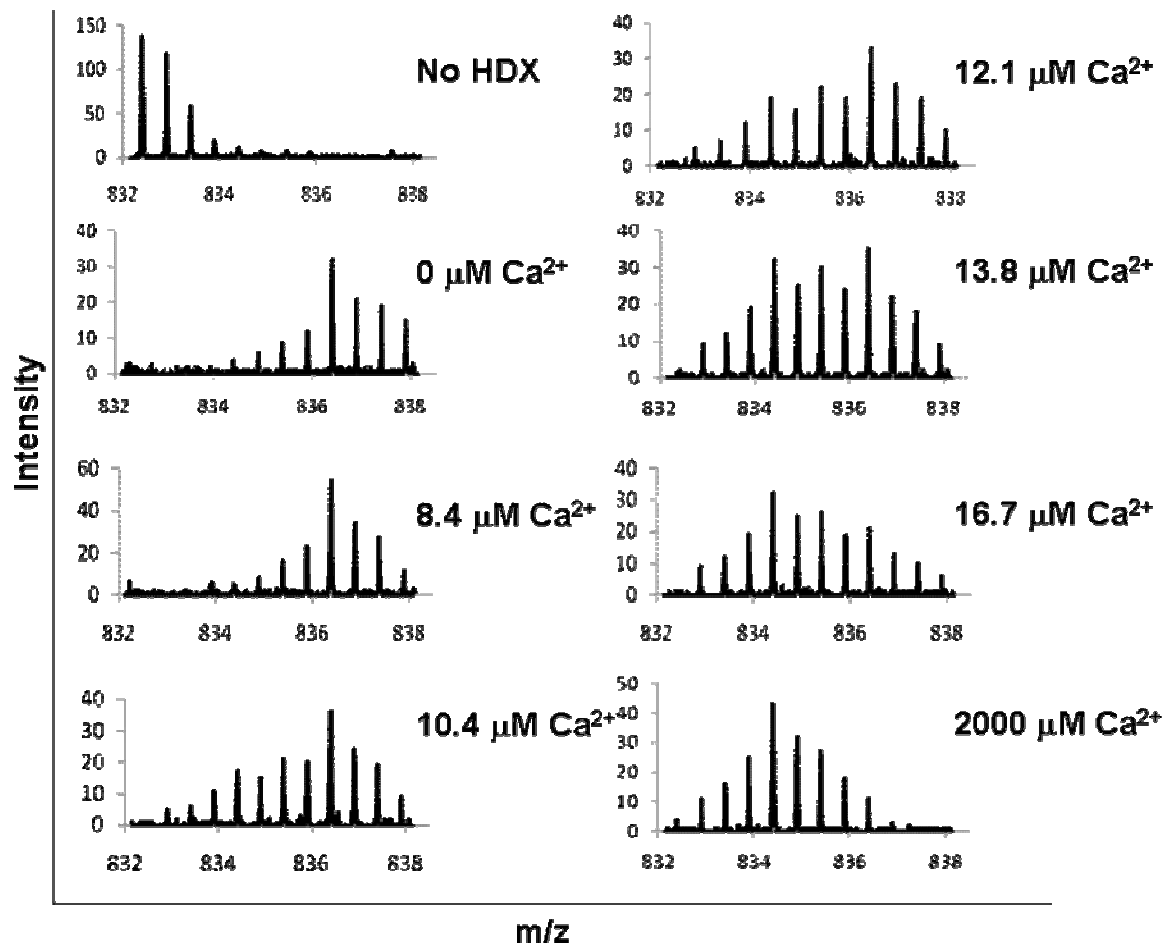

**Figure S6.** Spectra of the deuterated doubly charged peptic peptide 28-44 (EF-I) with respect to  $\text{Ca}^{2+}$  concentration.

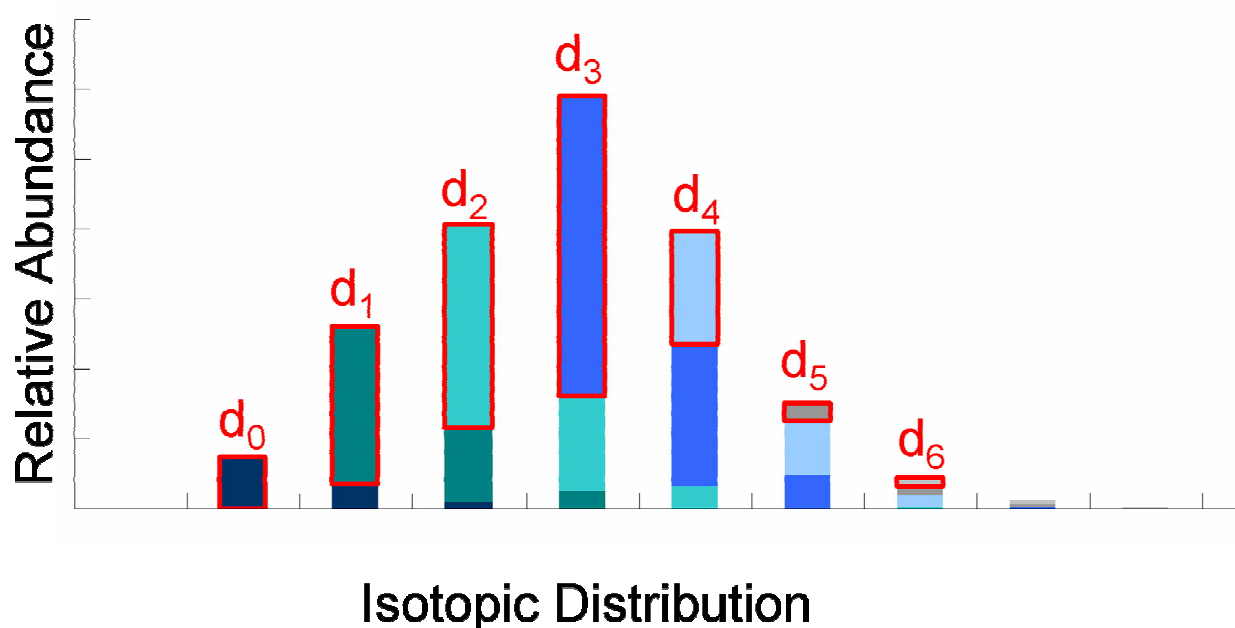

**Figure S7.** Deuterium distribution convolved with the native isotopic distribution of doubly charged peptide 63-73. Bars represent the different numbers of deuteriums ( $d_0$ ,  $d_1$ ,  $d_2$ ...) comprising each peak, and their heights include other isotopic contributions (C-13, N-15, O-18) (dark blue to light blue). Removing the native isotopic distribution leaves the deuterium distribution (bars outlined with red frames).
